# Supplementary material for: Synthesis of novel fluorescent copper nanomaterials and their application in detection of iodide ions and catalysis
Source: Royal Society of Chemistry journal article supplement (doi:10.1039/c8ay01871e), 2018-11-13
Supplement: c8ay01871e1.pdf [file c8ay01871e1.pdf]

## Supporting Information

### Synthesis of Novel Fluorescent Copper Nanomaterials and Their Application in Detection of Iodide Ions and Catalysis

Ning Wang<sup>a</sup>, Lu Ga<sup>b</sup>, Jun Ai<sup>a\*</sup>

<sup>a</sup> College of Chemistry and Environmental Science, Inner Mongolia Key Laboratory of Green Catalysis, Inner Mongolia Normal University, 81 zhaowudalu, Hohhot 010022, China

<sup>b</sup> College of Pharmacy, Inner Mongolia Medical University, Jinchuankaifaqu, Hohhot, 010110, China

<sup>c</sup> E-mail: [imacaj01@163.com](mailto:imacaj01@163.com).

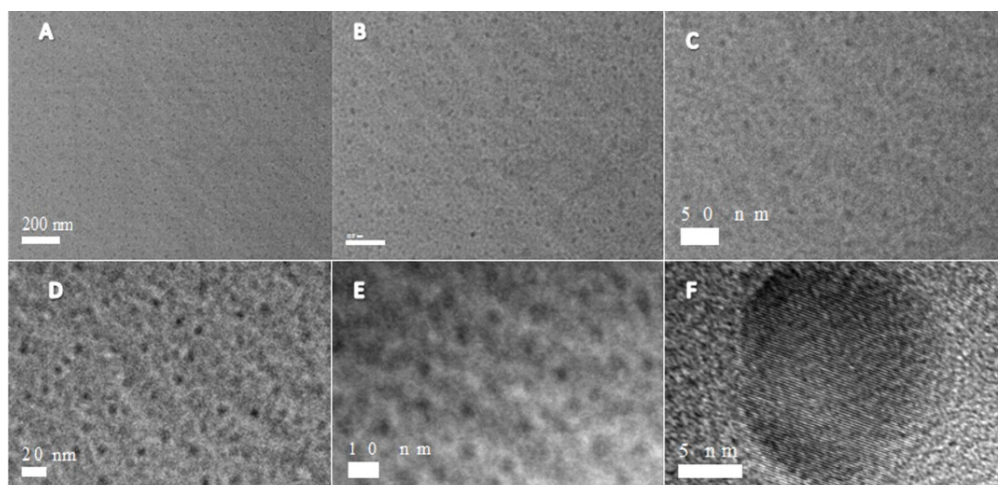

**Figure S1.** Proportion of different sizes TEM of Cu NPs

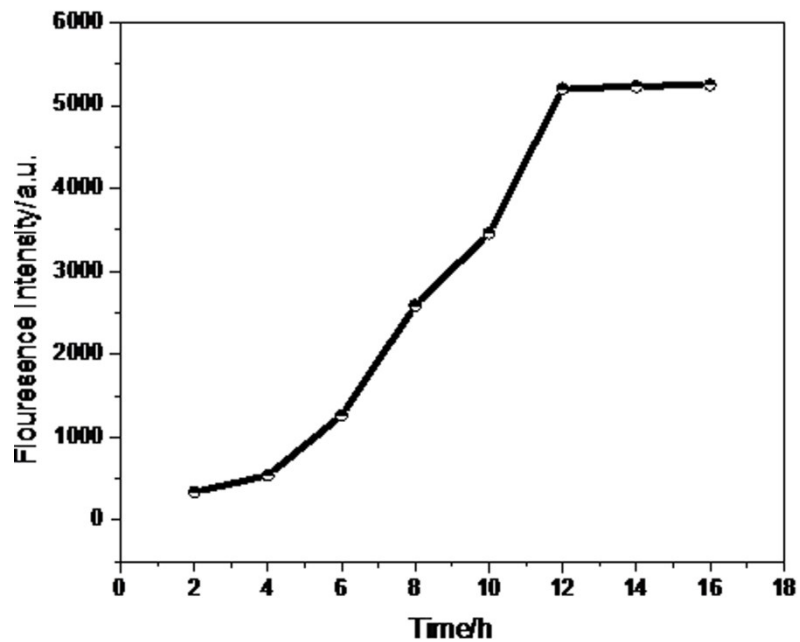

**Figure S2.** The fluorescence response of the resultant Cu NPs prepared at different reaction time

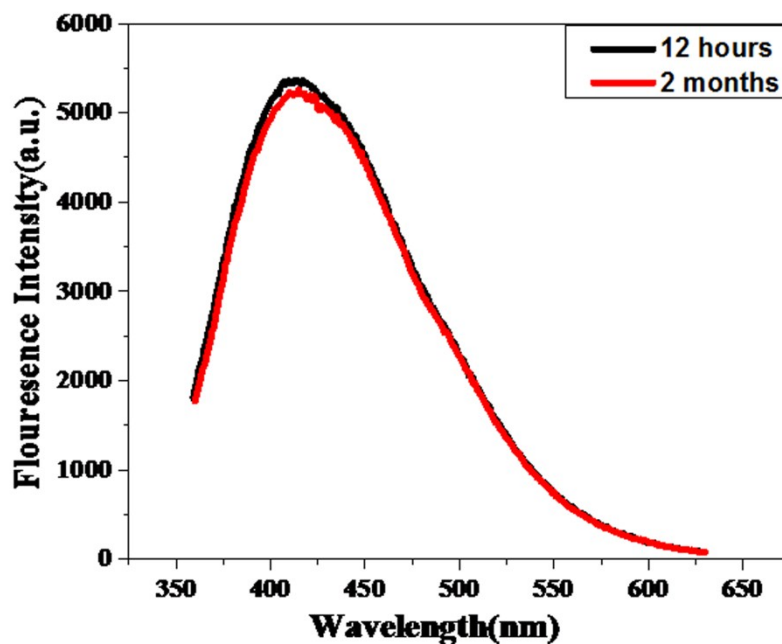

**Figure S3.** The fluorescence intensity of the CuNPs after two months storage at 4 °C.

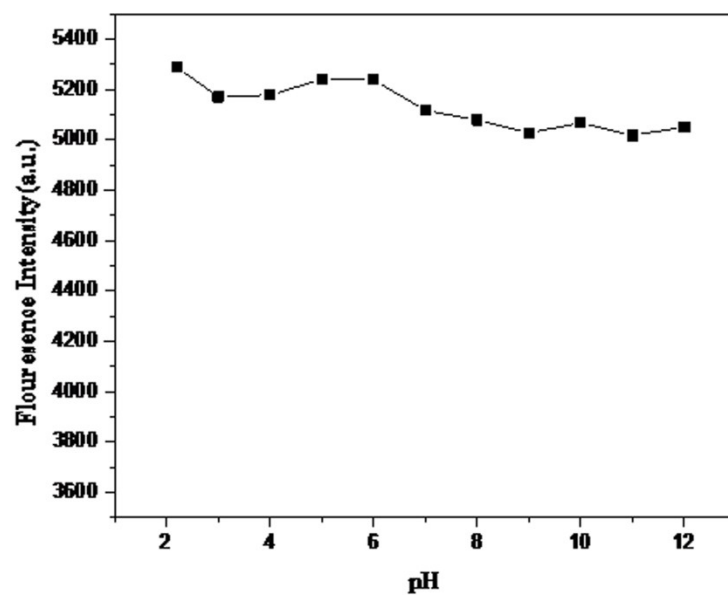

**Figure S4.** Fluorescence response of Cu NPs with different pH values.

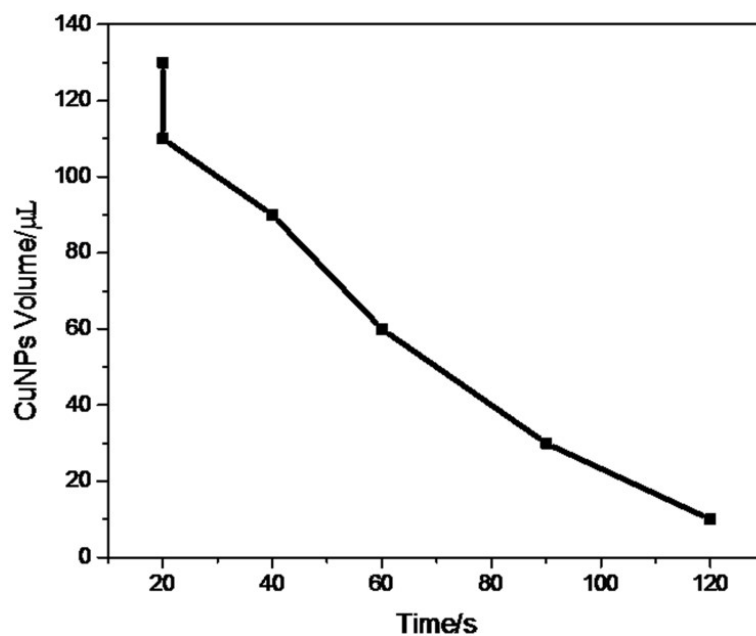

**Figure S5.** Response relationship between catalytic time and CuNPs addition.

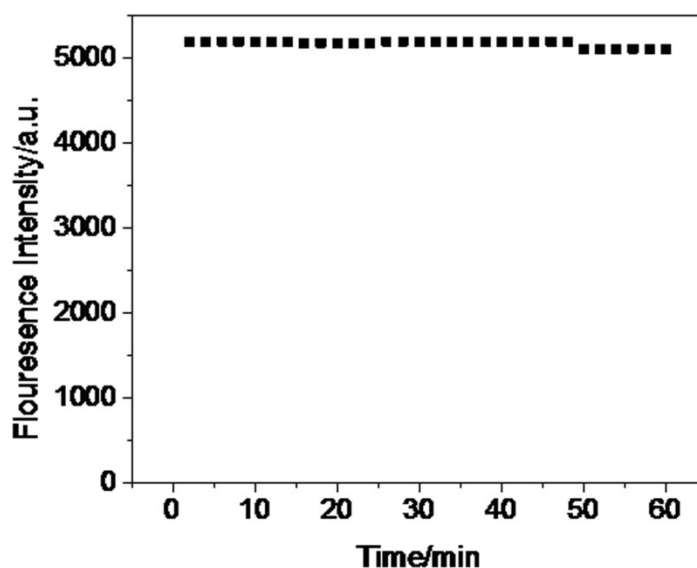

**Figure S6.** The fluorescence intensity of the CuNPs at the consecutive irradiation of a Xe lamp in different time.

**Table S1.** Comparison of the performance of different I<sup>-</sup> sensors.

| <b>Materials</b>    | <b>Linear range</b> | <b>LODs</b>  | <b>Ref.</b> |
|---------------------|---------------------|--------------|-------------|
| PEI-Cu NCs          | 0-800 $\mu$ M       | 100nM        | [1]         |
| Cu@Au Nanoparticles | 0-10 $\mu$ M        | 1 $\mu$ M    | [2]         |
| Au NPs              | 0.01-4 $\mu$ M      | 10nM         | [3]         |
| Au NPs              | 80-800 $\mu$ M      | 0.24 $\mu$ M | [4]         |
| Au NPs              | 0-4.5 $\mu$ M       | 10nM         | [5]         |
| Au NPs              | 0.5-120 $\mu$ M     | 15nM         | [6]         |
| Au NPs              | 145-120 $\mu$ M     | 0.5 $\mu$ M  | [7]         |
| Au@Ag NPs           | 20-135 $\mu$ M      | 5 $\mu$ M    | [8]         |
| Cu@Au NPs           | 1-80 $\mu$ M        | 5 $\mu$ M    | [9]         |
| Cu NPs              | 1-100 $\mu$ M       | 0.45 $\mu$ M | This study  |

#### References

- [1] Zhong Y, Wang Q, He Y, et al. A novel fluorescence and naked eye sensor for iodide in urine based on the iodide induced oxidative etching and aggregation of Cu nanoclusters[J]. Sens. Actuators B., 2015, 209:147-153.

- [2] Zhang J, Xu X W, Yang C, et al. Colorimetric Iodide Recognition and Sensing by Citrate-Stabilized Core/Shell Cu@Au Nanoparticles[J]. *Analytical Chemistry*, 2011, 83: 3911-3917.
- [3] Peng R, He H, Wang Q, et al. Cu( II ) triggering redox-regulated anti-aggregation of gold nanoparticles for ultrasensitive visual sensing of iodide[J]. *Analytica Chimica Acta*, 2018.
- [4] Liang L, Lan F, Li L, et al. Paper analytical devices for dynamic evaluation of cell surface N-glycan expression via a bimodal biosensor based on multibranch hybridization chain reaction amplification[J]. *Biosens Bioelectron*, 2016, 86: 756-763.
- [5] Xu H, Wang Y, Huang X, et al. Hg<sup>2+</sup>-mediated aggregation of gold nanoparticles for colorimetric screening of biothiols[J]. *Analyst*, 2012, 137: 924-931.
- [6] Uehara N, Ookubo K, Shimizu T. Colorimetric assay of glutathione based on the spontaneous disassembly of aggregated gold nanocomposites conjugated with water-soluble polymer[J]. *Langmuir*, 2010, 26: 6818-6825.
- [7] Grabar K C, Freeman R G, Hommer M B, et al. Preparation and characterization of Au colloid monolayers[J]. *Analytical Chemistry*, 1995, 67: 735-43.
- [8] Zeng J B, Cao Y Y, Luo C H, et al. A colorimetric assay for measuring iodide using Au@Ag core-shell nanoparticles coupled with Cu<sup>2+</sup>[J]. *Analytica Chimica Acta*, 2015, 891:269-276.
- [9] Zhang J, Xu X, Yang C, et al. Colorimetric iodide recognition and sensing by citrate-stabilized Core/Shell Cu@Au nanoparticles[J]. *Analytical Chemistry*. 2011, 83: 3911-3917.
